# Supplementary material
Source: PubMed Central journal article supplement (PMC10233821)
Supplement: NIHMS1899170-supplement-_Online_Supplement.pdf [file NIHMS1899170-supplement-_Online_Supplement.pdf]

**Supplemental Table A. Weighted Cox hazard models predicting family member death (HRS, 1992-2016)**

|                                                     | Mother         |                | Father         |                | Sibling        |                |
|-----------------------------------------------------|----------------|----------------|----------------|----------------|----------------|----------------|
|                                                     | Model 1        | Model 2        | Model 1        | Model 2        | Model 1        | Model 2        |
| Non-Hispanic Black                                  | 1.14*** (0.03) | 1.09*** (0.03) | 1.12*** (0.03) | 1.06* (0.03)   | 1.56*** (0.07) | 1.15** (0.06)  |
| U.S.-born Hispanic                                  | 0.98 (0.04)    | 0.93 (0.04)    | 0.93+ (0.04)   | 0.87*** (0.04) | 1.61*** (0.13) | 0.99 (0.08)    |
| Foreign-born Hispanic                               | 0.94 (0.04)    | 0.84*** (0.04) | 0.92* (0.03)   | 0.80*** (0.03) | 1.51*** (0.11) | 0.84* (0.07)   |
| Female                                              |                | 1.09*** (0.02) |                | 1.04* (0.02)   |                | 0.95 (0.04)    |
| Age                                                 |                | 1.01* (0.00)   |                | 1.01*** (0.00) |                | 0.91*** (0.00) |
| Educational attainment (ref: less than high school) |                |                |                |                |                |                |
| High school diploma                                 |                | 0.84*** (0.02) |                | 0.85*** (0.02) |                | 0.74*** (0.04) |
| Some college                                        |                | 0.73*** (0.02) |                | 0.76*** (0.02) |                | 0.64*** (0.04) |
| College degree or more                              |                | 0.75*** (0.02) |                | 0.72*** (0.02) |                | 0.55*** (0.03) |
| Household size in childhood                         |                | 0.98* (0.01)   |                | 0.99 (0.01)    |                | 1.04** (0.01)  |
| Lifetime number of siblings                         |                |                |                |                |                | 1.20*** (0.01) |
| Lifetime number of children                         |                |                |                |                |                |                |

**Supplemental Table A, continued.**

|                                                     | Child          |                | Spouse         |                |
|-----------------------------------------------------|----------------|----------------|----------------|----------------|
|                                                     | Model 1        | Model 2        | Model 1        | Model 2        |
| Non-Hispanic Black                                  | 1.98*** (0.14) | 1.39*** (0.10) | 1.34*** (0.08) | 1.17** (0.07)  |
| U.S.-born Hispanic                                  | 1.87*** (0.22) | 1.29* (0.16)   | 1.12 (0.11)    | 0.96 (0.10)    |
| Foreign-born Hispanic                               | 1.37* (0.19)   | 0.77 (0.13)    | 1.12 (0.10)    | 0.84+ (0.08)   |
| Woman (ref: man)                                    |                | 1.41*** (0.09) |                | 2.33*** (0.11) |
| Age                                                 |                | 1.02** (0.01)  |                | 1.03*** (0.01) |
| Educational attainment (ref: less than high school) |                |                |                |                |
| High school diploma                                 |                | 0.95 (0.08)    |                | 0.80*** (0.04) |
| Some college                                        |                | 0.85+ (0.08)   |                | 0.70*** (0.04) |
| College degree or more                              |                | 0.62*** (0.06) |                | 0.48*** (0.03) |
| Household size in childhood                         |                | 0.98 (0.02)    |                | 0.98 (0.02)    |
| Lifetime number of siblings                         |                |                |                |                |
| Lifetime number of children                         |                | 1.29*** (0.02) |                |                |

Note. Standard errors in parentheses; \*\*\*p < .001, \*\*p < .01, \*p < .05, +p < .10.

**Supplemental Table B. Weighted Cox hazard models predicting family member death (Add Health, Waves I-V)**

|                                                   | Mother         |                | Father         |                | Sibling        |                |
|---------------------------------------------------|----------------|----------------|----------------|----------------|----------------|----------------|
|                                                   | Model 1        | Model 2        | Model 1        | Model 2        | Model 1        | Model 2        |
| Non-Hispanic Black                                | 2.14*** (0.19) | 2.04*** (0.17) | 1.60*** (0.10) | 1.57*** (0.10) | 2.46*** (0.31) | 1.55** (0.22)  |
| U.S.-born Hispanic                                | 0.82 (0.10)    | 0.79+ (0.10)   | 1.02 (0.12)    | 1.01 (0.13)    | 0.92 (0.15)    | 0.69* (0.11)   |
| Foreign-born Hispanic                             | 0.58* (0.12)   | 0.53** (0.12)  | 0.75+ (0.13)   | 0.75+ (0.13)   | 1.37 (0.32)    | 0.94 (0.22)    |
| Female                                            |                | 1.16+ (0.09)   |                | 1.17** (0.07)  |                | 1.27** (0.11)  |
| Age                                               |                | 1.02 (0.02)    |                | 0.98 (0.02)    |                | 0.96 (0.03)    |
| Educational attainment (ref: high school or less) |                |                |                |                |                |                |
| Some college                                      |                | 0.76** (0.07)  |                | 0.85* (0.06)   |                | 0.79* (0.08)   |
| College degree                                    |                | 0.52*** (0.06) |                | 0.67*** (0.06) |                | 0.47*** (0.07) |
| Postgraduate degree                               |                | 0.45*** (0.06) |                | 0.44*** (0.04) |                | 0.46*** (0.08) |
| Household size in childhood                       |                | 0.96 (0.03)    |                | 0.92*** (0.02) |                | 0.94* (0.02)   |
| Lifetime number of siblings                       |                |                |                |                |                | 1.33*** (0.03) |
| Lifetime number of children                       |                |                |                |                |                |                |

**Supplemental Table B, continued.**

|                                                   | Child          |                | Spouse        |                |
|---------------------------------------------------|----------------|----------------|---------------|----------------|
|                                                   | Model 1        | Model 2        | Model 1       | Model 2        |
| Non-Hispanic Black                                | 2.28*** (0.51) | 1.93** (0.45)  | 1.31 (0.55)   | 1.16 (0.52)    |
| U.S.-born Hispanic                                | 1.37 (0.48)    | 1.44 (0.49)    | 1.71 (0.92)   | 1.49 (0.88)    |
| Foreign-born Hispanic                             | 1.29 (0.65)    | 1.13 (0.56)    | 0.06** (0.05) | 0.04*** (0.04) |
| Woman (ref: man)                                  |                | 2.00** (0.45)  |               | 4.90*** (2.08) |
| Age                                               |                | 0.98 (0.06)    |               | 1.02 (0.10)    |
| Educational attainment (ref: high school or less) |                |                |               |                |
| Some college                                      |                | 0.59* (0.14)   |               | 1.59 (0.75)    |
| College degree                                    |                | 0.26*** (0.09) |               | 0.47 (0.34)    |
| Postgraduate degree                               |                | 0.36** (0.12)  |               | 0.30 (0.24)    |
| Household size in childhood                       |                | 0.84* (0.06)   |               | 1.10 (0.12)    |
| Lifetime number of siblings                       |                |                |               |                |
| Lifetime number of children                       |                | 1.69*** (0.15) |               |                |

Note. Standard errors in parentheses; \*\*\*p < .001, \*\*p < .01, \*p < .05, +p < .10.
